# Supplementary material for: Multiparametric Radiogenomic Model to Predict Survival in Patients with Glioblastoma
Source: MDPI journal article supplement (doi:10.3390/cancers16030589), 2024-01-30
Supplement: s1 [file s1]

**Supplementary Table S1:** List of contributing MRI texture features following LASSO regularization and logistic regression analysis.

| <b>Texture feature:</b>                      | <b>AUC /Sensitivity /Specificity /Threshold</b> |
|----------------------------------------------|-------------------------------------------------|
| GLCM Informational Measurement Correlation 1 | 0.63 / 90.5 / 33.8 / 0.14                       |
| GLRLM Long Run Emphasis                      | 0.60 / 78.6 / 43.2 / 1.51                       |
| GLRLM Run Percentage                         | 0.60 / 71.4 / 48.6 / 0.89                       |
| GLSZM Zone Percentage                        | 0.61 / 71.4 / 51.4 / 0.22                       |
| GLDMGL Dependence Non-Uniformity Norm        | 0.60 / 90.5 / 29.7 / 0.16                       |
| GLDM Dependence Entropy                      | 0.61 / 57.1 / 62.2 / 8.0                        |
| GLCM Informational Measurement Correlation 1 | 0.62 / 45.2 / 81.1 / 0.18                       |

The texture features in the top six rows are from FLAIR images. The texture feature in the bottom row is from ADC images. Key: GLCM (Gray level co-occurrence matrix), GLRLM (Gray level run length matrix), GLSZM (Gray level size zone matrix), GLDMGL (Gray level dependence matrix), GLDM (Gray level dependence matrix).
